# Supplementary material for: Insight into the Effect of Glycerol on Dielectric Relaxation and Transport Properties of Potassium-Ion-Conducting Solid Biopolymer Electrolytes for Application in Solid-State Electrochemical Double-Layer Capacitor
Source: MDPI journal article supplement (doi:10.3390/molecules28083461), 2023-04-14
Supplement: s1 [file s1]

# Insight into the effect of glycerol on dielectric relaxation and transport properties of potassium ion-conducting solid biopolymer electrolytes for application in solid-state EDLC

Abdullahi Abbas Adam<sup>1,2,3\*</sup>, Hassan Soleimani<sup>1</sup>, John Ojur Dennis<sup>1</sup>, Osamah A. Aldaghri<sup>4,\*</sup>, Ahmed Alsadig<sup>5</sup>, Khalid Hassan Ibnaouf<sup>4</sup>, Bashir Abubakar Abdulkadir<sup>6</sup>, Ismael Abdalla Wadi<sup>7,8</sup>, Vipin Cyriac<sup>9</sup>, Muhammad Fadhlullah Bin Abd. Shukur<sup>1,2</sup>

<sup>1</sup> Department of Fundamental and Applied Sciences, Universiti Teknologi PETRONAS, Seri Iskandar 32610, Perak, Malaysia; hassan.soleimani@utp.edu.my (H.S.); mfadhlullah.ashukur@utp.edu.my (M.F.B.A.S.); jdennis100@gmail.com (J.O.D.)

<sup>2</sup> Centre of Innovative Nanoscience and Nanotechnology (COINN), Universiti Teknologi PETRONAS, Seri Iskandar 32610, Perak, Malaysia

<sup>3</sup> Department of Physics, Al-Qalam University Katsina, Katsina 820252, Nigeria

<sup>4</sup> Department of Physics, College of Science, Imam Mohammad Ibn Saud Islamic University (IMSIU), Riyadh 13318, Kingdom of Saudi Arabia (KSA); khiahmed@imamu.edu.sa (K.H.I.)

<sup>5</sup> CNR Nanotec, University Campus Ecotekne, 73100 Lecce LE, Italy; ahmed.alsadig@nanotec.cnr.it (A.A)

<sup>6</sup> Department of Chemistry, Gombe State University, P. M. B. 127, Gombe, Gombe State, Nigeria; abubakarbashir150@gmail.com (A.B.A.)

<sup>7</sup> Prince Sattam Bin Abdulaziz University, Preparatory Year Unit, Alkharj, Saudi Arabia; i.a.wadi101@gmail.com (I.A.W.)

<sup>8</sup> University of Nyala, Faculty of Education, Physics Department, Nyala, Sudan.

<sup>9</sup> Department of Physics, Manipal Institute of Technology, Manipal Academy of Higher Education, Manipal 576104, Karnataka, India; vipin.cyriac@learner.manipal.edu (V.C)

\* Correspondence: abbasabdullah17@hotmail.com (A.A.A.); odaghri@imamu.edu.sa (O.A.)

Table S1. Ionic conductivity of MC/PC/K<sub>3</sub>PO<sub>4</sub>/glycerol SBEs

| Sample | Film thickness<br>$\times 10^{-2}$ (cm) | Bulk resistance<br>( $\Omega$ ) | Ionic<br>conductivity<br>( $\text{Scm}^{-1}$ ) |
|--------|-----------------------------------------|---------------------------------|------------------------------------------------|
| SC10   | 2.98                                    | $4.02 \times 10^2$              | $2.36 \times 10^{-5}$                          |
| SC20   | 3.19                                    | $3.63 \times 10^2$              | $2.81 \times 10^{-5}$                          |
| SC30   | 3.47                                    | $1.08 \times 10^2$              | $4.25 \times 10^{-5}$                          |
| SC40   | 4.18                                    | $4.67 \times 10^1$              | $2.85 \times 10^{-4}$                          |
| SC50   | 4.31                                    | $1.84 \times 10^1$              | $7.46 \times 10^{-4}$                          |
| SC60   | 5.52                                    | $5.09 \times 10^1$              | $3.45 \times 10^{-4}$                          |

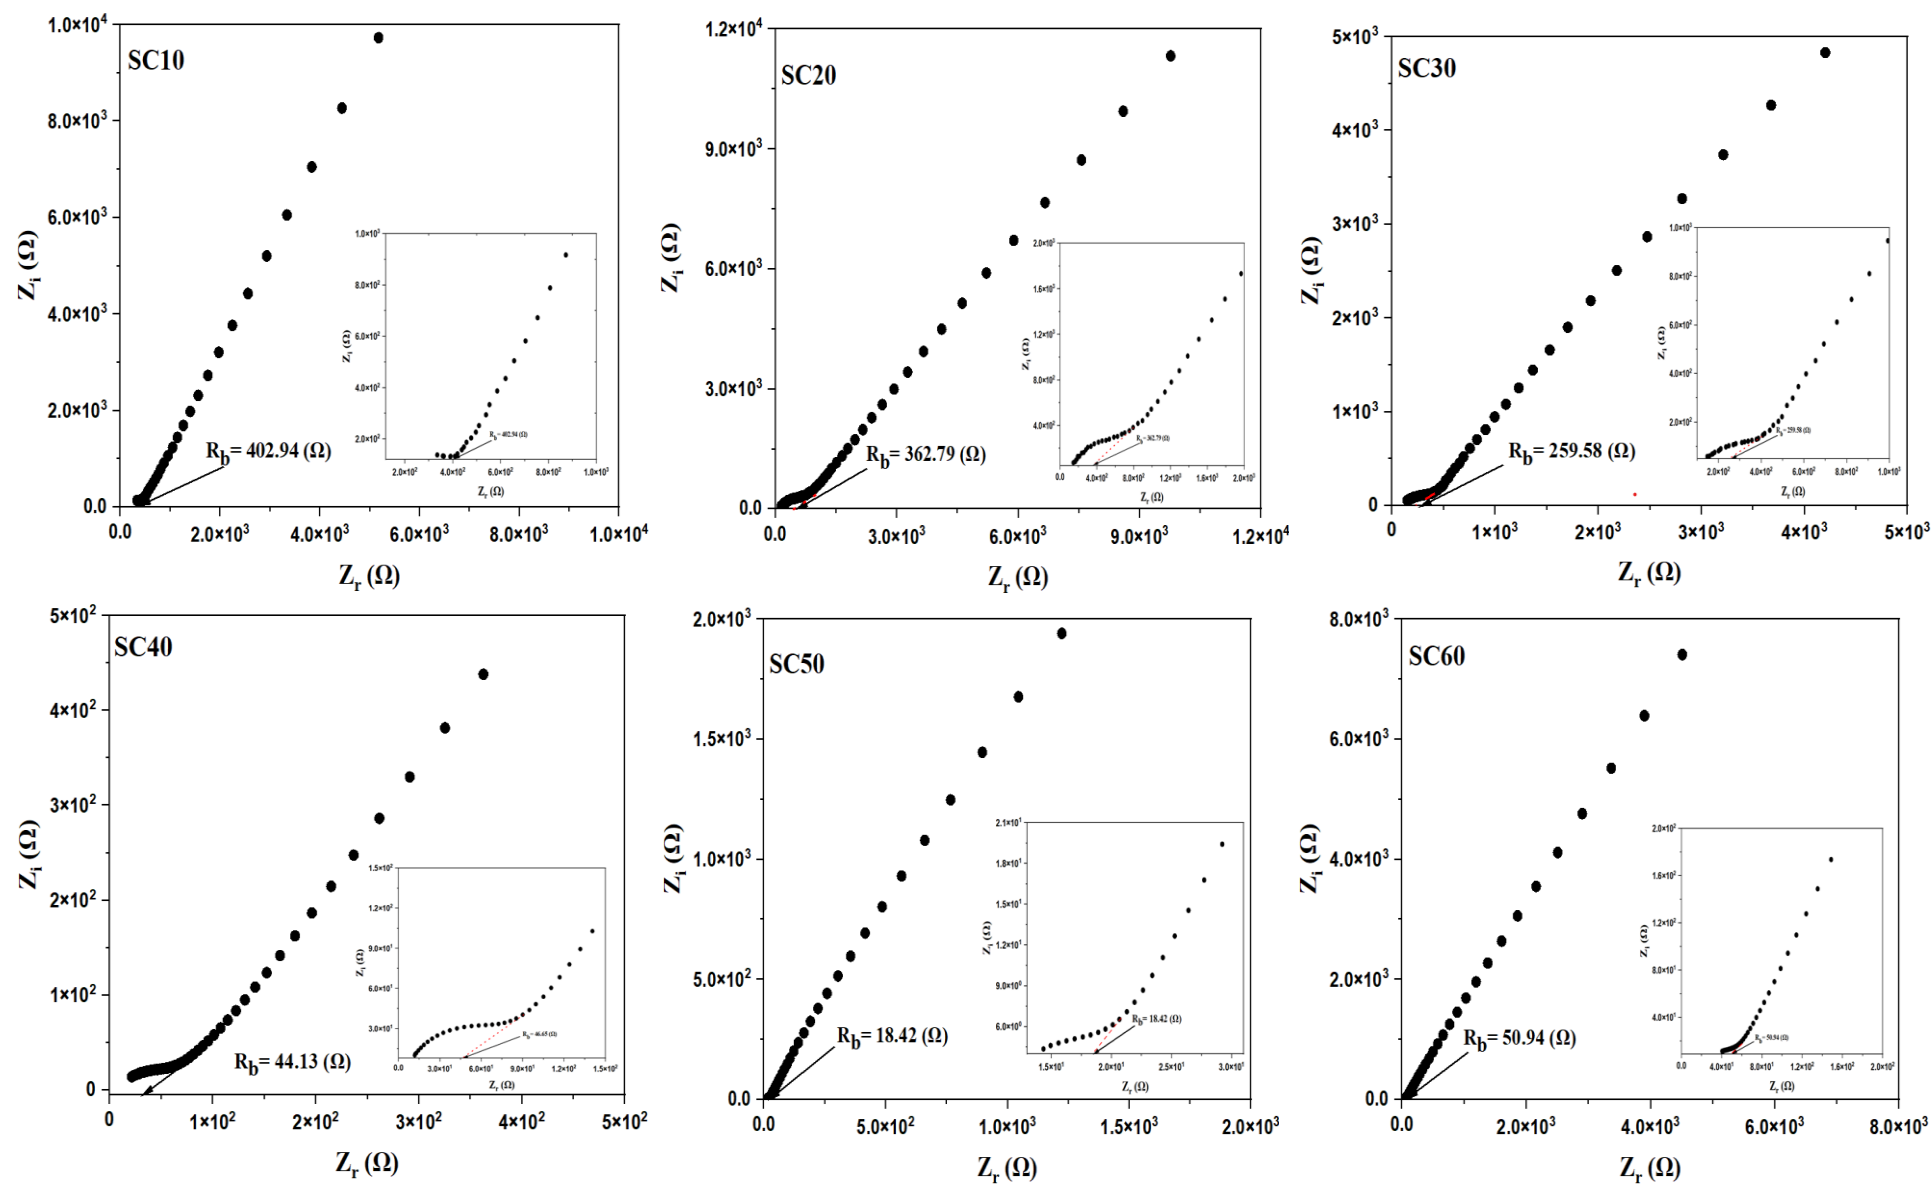

Figure S1. EIS plots showing the bulk resistance of MC/PC/K3PO4/glycerol SBEs

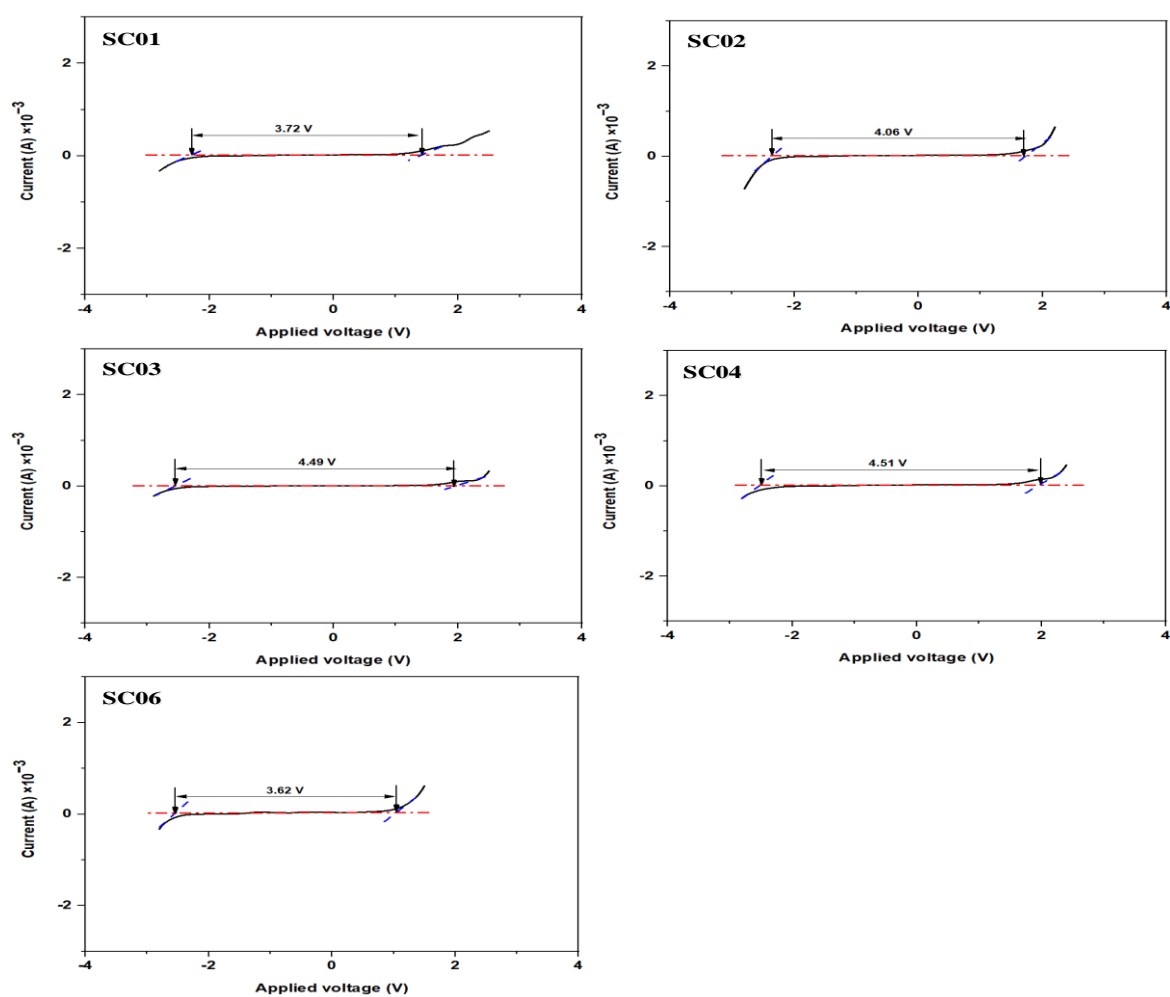

Figure S2. LSV curves showing the electrochemical stability window of remaining MC/PC/K<sub>3</sub>PO<sub>4</sub>/glycerol-based SBEs
